1 **Trajectory of rich club properties in structural brain networks**

2

3 Levin Riedel<sup>1</sup>, Martijn P. van den Heuvel<sup>2</sup>, & Sebastian Markett<sup>3\*</sup>

4 <sup>1</sup> Humboldt-Universität zu Berlin, Berlin School of Mind and Brain, Berlin, Germany

5 <sup>2</sup> Vrije Universiteit Amsterdam, The Netherlands

6 <sup>3</sup> Humboldt-Universität zu Berlin, Department of Psychology, Berlin, Germany

7

8

9

10

11

12

13

14

15

16

17

18

19

20

21

22

23

24

25

26

27

28

29

30 

---

\*corresponding author's address:

31 Dr. Sebastian Markett

32 Humboldt Universität zu Berlin

33 Unter den Linden 6

34 10099 Berlin, Germany

35 sebastian.markett@hu-berlin.de

1 **Abstract**

2 Many organizational principles of structural brain networks are established before birth and  
3 undergo considerable developmental changes afterwards. These include the topologically  
4 central hub regions and a densely connected rich club. While several studies have mapped  
5 developmental trajectories of brain connectivity and brain network organization across  
6 childhood and adolescence, comparatively little is known about subsequent development over  
7 the course of the lifespan. Here, we present a cross-sectional analysis of structural brain  
8 network development in N = 8,066 participants aged 5 to 80 years. Across all brain regions,  
9 structural connectivity strength followed an ‘inverted-U’-shaped trajectory with vertex in the  
10 early 30s. Connectivity strength of hub regions showed a similar trajectory and the identity of  
11 hub regions remained stable across all age groups. While connectivity strength declined with  
12 advancing age, the organization of hub regions into a rich club did not only remain intact but  
13 became more pronounced, presumably through a selected sparing of relevant connections  
14 from age-related connectivity loss. The stability of rich club organization in the face of overall  
15 age-related decline is consistent with a “first come, last served” model of neurodevelopment,  
16 where the first principles to develop are the last to decline with age. Rich club organization  
17 has been shown to be highly beneficial for communicability and higher cognition. A resilient  
18 rich club might thus be protective of a functional loss in late adulthood and represent a neural  
19 reserve to sustain cognitive functioning in the aging brain.

20

## 1 **1 Introduction**

2 The human brain is an intricate network whose complex wiring diagram can be reconstructed  
3 *in vivo* from magnetic resonance imaging (MRI) data and abstracted in a connectome network  
4 map (Park & Friston, 2013; Sporns, 2011; Hagmann, 2005; Hagmann et al., 2007; Sporns et  
5 al., 2005). The application of network analytics to such connectome maps has revealed that  
6 brain-wide topology of structural fiber connections follows several principles (Bullmore &  
7 Sporns, 2009): Across the brain, regions differ considerably in the number of their  
8 interconnections with other regions. Few regions claim the lion's share of connections  
9 (Hagmann et al., 2008) and act as hubs in the brain network (van den Heuvel & Sporns,  
10 2013). Hubs are multi- and transmodal regions that are topologically central in the network  
11 (Gong et al., 2009; Sporns et al., 2007), metabolically expensive (Collin et al., 2014), and  
12 involved in the integration of modular and segregated brain function (Bertolero et al., 2015;  
13 Cohen & D'Esposito, 2016; van den Heuvel & Sporns, 2013; Sporns, 2013). Highly  
14 connected brain regions tend to connect stronger to other highly connected regions than  
15 expected by their high number of connections alone, ultimately forming a rich club of densely  
16 interconnected brain regions that form the backbone for global brain communication (van den  
17 Heuvel et al., 2012; van den Heuvel & Sporns, 2011).

18  
19 The human brain undergoes developmental changes across the lifespan (Sowell et al., 2004).  
20 While gray matter volume decreases non-linearly from childhood to old age, white matter  
21 volume and the integrity of fiber connections follow an 'inverted U' shaped trajectory with  
22 increases into mid-adulthood and a decline thereafter (Kochunov et al., 2012; Sowell et al.,  
23 2003). This raises the question whether topological features of brain network organization  
24 follow similar life span trajectories. Major organizational principles of the structural  
25 connectome such as network hubs and a rich club are already present as early as gestational  
26 week 30, suggesting that network formation occurs prenatally during the second trimester  
27 (Ball et al., 2014). During the third trimester, major maturation occurs on connections from  
28 the rich club to the rest of the connectome network (i.e. on so-called feeder connections), a  
29 pattern that continues across childhood (Wierenga et al., 2018). The overall tendency of high-  
30 degree nodes to connect preferably to other high degree nodes which gives rise to the rich  
31 club phenomenon, however, does not seem to change between childhood and adulthood  
32 (Grayson et al., 2014), even though the connectivity strength between rich club areas  
33 increases during adolescence (Baker et al., 2015). These findings are in line with a  
34 developmental model where qualitative principles are present from very early on and then

1 develop quantitatively in two subsequent stages with connections of unimodal and peripheral  
2 brain regions maturing during childhood, and connections of multimodal and central hub  
3 regions maturing during adolescence (Wierenga et al., 2015). While network maturation  
4 during childhood and adolescence has received considerable attention (see also Hagmann et  
5 al., 2010), less is known about developmental trajectories across the adult life span. One  
6 report has found ‘inverted U’ shaped trajectories for nodal connectivity strength and  
7 efficiency (Zhao et al., 2015). Maturation of connections between hub regions peak earlier  
8 (i.e., late 20s/early 30s) than connectivity between hubs and the periphery (late 30s), resulting  
9 in a linear decrease of rich club organization across the life span. This finding stands in  
10 contrast to life span evidence on functional connectivity that suggests an ‘inverted U’ shaped  
11 trajectory (with peak at around age 40) for rich club organization (Cao et al., 2014). Given the  
12 paucity of life span data on connectome organization, the present report seeks to re-examine  
13 the life span trajectory of network hubs and the rich club in structural brain networks. We will  
14 go beyond previous studies by dramatically increasing the sample size and utilizing a large  
15 cross-sectional data set with structural connectomes of  $N = 8,066$  participants aged 5 to 80  
16 years. Specifically, we seek to map the life span trajectories of hub connectivity, the identity  
17 of hub regions according to data-driven criteria for hub definition, and rich club properties of  
18 the brain network.

## 19 **2 Methods**

### 20 **2.1 Participants**

21 We used openly available connectome data from the 10kin1day data set (van den Heuvel et  
22 al., 2019). This data set contains structural connectome data from  $N = 8,168$  participants ( $n =$   
23  $3824$  females,  $n = 4339$  males,  $n = 5$  no gender specified) who are either classified as healthy  
24 controls or as patients with psychiatric or neurological illness ( $n = 4481$  controls,  $n = 3668$   
25 patients,  $n = 19$  no disease status specified). Patient status is given as binary category and no  
26 details on the precise diagnosis is given. The connectome dataset contains participants aged 0  
27 to 90 years in 19 age groups (see table 1). Quality assurance and outlier removal have been  
28 performed by the curators of the data set. For our analysis, we additionally excluded the age  
29 groups 0, 0-5, 80-85, and 85-90 due to their small sample size, as well as the participants with  
30 unknown disease status or gender, resulting in a sample of  $N = 8,066$  participants ( $n = 3776$   
31 females,  $n = 4290$  males). The 10kin1day data set is the result of a three-day pop-up data  
32 processing event and contains jointly analyzed data from 42 different research groups.  
33 Informed written consent was obtained from all participants at each acquisition site and the

1 protocols were approved by the local ethics committees at the independent research  
2 institutions.

3

4 **Table 1** Age, gender and patient status distribution of the participants included in the 10kin1day  
5 dataset.

| Age group | Gender  |       |         | Patient status |          |         |
|-----------|---------|-------|---------|----------------|----------|---------|
|           | Females | Males | Unknown | Controls       | Patients | Unknown |
| 0         | 3       | 9     | 0       | 0              | 12       | 0       |
| 0 - 5     | 14      | 20    | 1       | 0              | 35       | 0       |
| 5 - 10    | 57      | 75    | 0       | 76             | 56       | 0       |
| 10 - 15   | 182     | 201   | 0       | 316            | 66       | 1       |
| 15 - 20   | 389     | 398   | 0       | 567            | 220      | 0       |
| 20 - 25   | 666     | 637   | 0       | 854            | 445      | 4       |
| 25 - 30   | 446     | 639   | 0       | 658            | 422      | 5       |
| 30 - 35   | 300     | 424   | 1       | 380            | 342      | 3       |
| 35 - 40   | 223     | 319   | 0       | 258            | 283      | 1       |
| 40 - 45   | 265     | 291   | 0       | 249            | 307      | 0       |
| 45 - 50   | 272     | 248   | 0       | 258            | 262      | 0       |
| 50 - 55   | 272     | 249   | 1       | 224            | 298      | 0       |
| 55 - 60   | 226     | 211   | 0       | 163            | 271      | 3       |
| 60 - 65   | 191     | 217   | 0       | 121            | 287      | 0       |
| 65 - 70   | 162     | 206   | 1       | 186            | 183      | 0       |
| 70 - 75   | 100     | 120   | 1       | 95             | 124      | 2       |
| 75 - 80   | 39      | 60    | 0       | 51             | 48       | 0       |
| 80 - 85   | 14      | 14    | 0       | 21             | 7        | 0       |
| 85 - 90   | 3       | 1     | 0       | 4              | 0        | 0       |

6

## 7 **2.2 Data acquisition and processing**

8 The 10kin1day data set includes imaging data from 42 different groups acquired on different  
9 scanners with varying field strength (1.5 and 3T) and acquisition parameters. Data were  
10 processed with a unified pipeline. Details on the processing pipeline and quality control are  
11 given in van den Heuvel et al. (2019). In brief, connectomes were assembled by first  
12 obtaining a cortical and subcortical gray matter parcellation from running T1-weighted  
13 structural images through Freesurfer (Fischl et al., 2004) and then collating the resulting

1 parcellation with DTI data. Diffusion data were first corrected for susceptibility and eddy  
2 current distortions. Then each voxel's main diffusion direction was obtained via robust tensor  
3 fitting. Large white matter pathways were formed by deterministic fiber tractography (Mori et  
4 al., 1999). Fiber streamlines were propagated along each voxel's main diffusion direction  
5 after originating from eight seeds evenly distributed across each white matter voxel until a  
6 stopping criterion was met (hitting a voxel with  $FA < .1$ , a voxel outside the brain mask, or  
7 making a turn of  $> 45$  degrees). A pair of regions from the gray matter parcellations was  
8 considered connected when both regions were touched by a reconstructed streamline.  
9 Connections were weighted with different metrics, of which we used three in the present  
10 report: the total number of streamlines (NOS) that touched both ROIs, mean fractional  
11 anisotropy (FA) of white matter voxels in reconstructed fiber tracts, and streamline-volume  
12 density (SVD, which is the number of streamlines normalized to the region volume). Gray  
13 matter regions were defined according to the Desikan-Killiany standard Freesurfer  
14 parcellation (aparc, Desikan et al., 2006) with 82 regions of interest. This resulted in three  
15 weighted (NOS, FA, SVD) and undirected connectome matrices for each individual. Unless  
16 stated otherwise, we present results from the NOS-weighted connectome matrices.

### 17 **2.3 Network analysis**

18 Network analyses were performed in MATLAB (MathWorks, version 20a), using the Brain  
19 Connectivity Toolbox (BCT, Rubinov & Sporns, 2010). The network analyses were used to  
20 first compare the average network connectivity between the different age groups. Then, the  
21 rich club property was analyzed for each individual and compared between age groups.  
22 Finally, based on the network connectivity and different criteria, including the rich club  
23 results, hub regions of each individual were defined, to also compare the average hub region  
24 connectivity between different age groups.

#### 25 *Connectivity analysis*

26 All three different weights, number of streamlines (NOS), fractional anisotropy (FA), and  
27 streamline-volume density (SVD), were each averaged for all subjects individually, excluding  
28 non-existent connections. To account for differences in NOS and SVD weights based on brain  
29 region volume, regional volumes were averaged for all subjects. Also, the network density,  
30 maximum node degree and maximum connection weight (NOS) of each network were  
31 computed with their respective BCT functions (density\_und.m, degrees\_und.m). The  
32 calculations were done to later model connection weights and brain region volume for all age  
33 groups, while still accounting for inter-individual variability.

## 1 *Rich club analysis*

2 We followed standard procedures for rich club analysis (van den Heuvel et al., 2013). A  
3 network is said to have rich club properties when high degree nodes show a higher level of  
4 interconnectedness than expected from their high degree alone (van den Heuvel & Sporns,  
5 2011), across a range of degree thresholds. The rich club regime was established as follows:  
6 We first computed the weighted rich club coefficient (using the BCT function  
7 `rich_club_wu.m`) across the full range of levels  $k$  from the network's degree distribution ( $k=1,$   
8  $\dots, n$ ). Because high degree nodes have a high likelihood to connect to other high degree  
9 nodes by chance alone, it is necessary to establish that the empirical level of  
10 interconnectedness exceeds the level of interconnectedness in random networks. We created  
11 2,500 random networks per participant by reshuffling all connections in the matrix while  
12 preserving the degree distribution of the network (BCT function `randmio_und.m`). Each  
13 connection was rewired 10 times. At each level  $k$ , normalized rich club coefficients were then  
14 obtained by dividing empirical coefficients by the mean coefficient from all 2,500 iterations  
15 of the random network. We also used the distribution of random network coefficients to  
16 derive a p-value of the probability that the empirical rich club coefficient resulted from the  
17 non-selective high interconnectedness of high degree nodes. We corrected the false discovery  
18 rate (FDR) across the full range of p-values by applying the Benjamini & Hochberg (1995)  
19 procedure (Groppe, 2020). As a result, we obtained three curves across all levels  $k$ : a curve  
20 for the empirical rich club coefficient, a curve for the mean random rich club coefficient, and  
21 a curve for the normalized rich club coefficient. We derived our main outcome measures of  
22 individual rich club organization from these curves. We determined the rich club regime as  
23 the largest series of subsequent  $k$ , where the empirical rich club coefficient was larger than the  
24 rich club coefficient in 95% of all random networks ( $p\text{-value} < 0.05$ , FDR-corrected). We  
25 used the following algorithm to identify the rich club regime: We first selected the lowest and  
26 highest  $k$ -level with  $p < .05$ . If all interjacent p-values were also  $< .05$ , we defined the range  
27 between the two  $k$ -values as the rich club regime. If this was not the case, we applied the  
28 following: If only one single or two non-neighboring p-values within this range were  $> .05$ ,  
29 we still considered the range as rich club regime (thus considering these datapoints as  
30 outliers). In case that two or more neighboring p-values exceeded the  $.05$  threshold (i.e.,  
31 cutting the range between the lowest and highest  $k$ -level with  $p < .05$  in two or more), we  
32 assessed whether any of the ranges exceeded the other ones by a factor of 1.5. If this was the  
33 case, we assumed this range as the rich club regime. If no range was 1.5-times larger, we  
34 assumed the range with larger  $k$  values (i.e., at the upper end of the normalized rich club

1 curve) as the rich club regime. If none of the criteria applied, we did not assume a valid  
2 continuous rich club regime for this participant. This was the case in 362 participants (~4.5%)  
3 who were excluded from further analysis. Once a valid rich club regime was established, we  
4 computed the following measures for each participant: We defined the length of the rich club  
5 regime as the difference between the upper and lower end of the rich club regime (if, for  
6 example, the empirical rich club coefficient exceeded the random rich club coefficient with  
7  $p < .05$ , corrected, on all k-levels between  $k=12$  and  $k=27$ , the length of the rich club regime  
8 was determined to be 15). A longer rich club regime might imply that more brain regions  
9 belong to the rich club. We also assessed this directly by determining how many nodes had a  
10 nodal degree equal to or larger than the first k-level belonging to the rich club regime. While  
11 these measures inform us on the size of the rich club in terms of its members, it does not give  
12 us information on the strength of the rich club effect, i.e., on how much the empirical rich  
13 club coefficient exceeds the rich club coefficient in comparable random networks. We  
14 therefore extracted the peak of the normalized rich club curve as a point estimate and also  
15 calculated the area under the normalized rich club curve above 1 with the trapezoidal method  
16 (trapz.m). The latter measure scales both with the number of rich club members and the  
17 strength of the rich club effect. Because the normalized rich club coefficient is a ratio between  
18 empirical and random coefficients, a separate analysis of the numerator and denominator can  
19 also be of interest. We therefore extracted additionally the areas under the empirical and  
20 random rich club curves (including the area below 1).

21 To distinguish the effect of changes in nodal degree or connection weights on the rich club  
22 results, the same analysis as described above was performed on binary connectome matrices.  
23 We used the respective BCT function (rich\_club\_bu.m) to compute binary rich club  
24 coefficients for each participant's empirical network and for 2,500 permuted versions of the  
25 network. As the intention for this analysis was a direct control-comparison for the weighted  
26 rich club results, we based all outcome measures on the rich club regimes from the weighted  
27 analysis. We extracted the peak of the normalized binary rich club curve and the area under  
28 the normalized, empirical and random binary rich club curves for each individual.

### 29 *Hub analysis*

30 Hub definition is commonly based on different centrality-related network metrics and  
31 statistical criteria (van den Heuvel & Sporns, 2013). We defined hub participation according  
32 to five separate criteria: Brain regions were classified as hubs when they either belonged to  
33 the top 15% of the degree distribution (criterion a), to the top 15% of the strength (i.e.  
34 weighted degree) distribution (criterion b), when their nodal degree was equal to or larger



1 than the nodal degree of the starting point of the rich club regime (criterion c), equal to or  
2 larger than the nodal degree of the peak of the normalized rich club curve (criterion d), or  
3 based on hub scores (criterion e). The hub score measure (criterion e) was composed of five  
4 centrality measures: nodal degree, betweenness centrality, nodal path length, between-module  
5 participation coefficient, and within-module degree z score. Nodal degree and betweenness  
6 centrality were calculated with their respective BCT functions (`betweenness_wei.m`,  
7 `degrees_und.m`). Between-module participation coefficient and within-module degree z score  
8 were calculated with BCT functions (`participation_coef.m` and `module_degree_zscore.m`)  
9 based on module parcellations for each combination of age group and disease status. Module  
10 parcellations were identified with the BCT function `bct_community.m` based on group  
11 connectomes that contained the average connection weights for all connections present in at  
12 least 60 % of the group's participants. Nodal path length was calculated as the sum of the  
13 node's distance to other nodes (as given by the BCT function `distance_wei.m`) divided by the  
14 number of all other nodes. Betweenness centrality and nodal path length used the  
15 connectivity-length matrix (as given by  $1/\text{connection weight}$ ) to represent higher connection  
16 weights as shorter paths. Brain regions present in the top 33 % of at least four out of five  
17 centrality measures were defined as hub regions according to hub scores (van den Heuvel et  
18 al., 2015). We verified this hub-definition by a complementary approach that used the k-  
19 means algorithm (with  $k = 2$ ) to partition all nodes into hub and non-hub regions based on all  
20 five centrality measures from the hub score measure (criterion e) (Markett et al., 2020).  
21 We defined hubs in each individual brain network according to the criteria outlined above.  
22 For each hub definition, we then defined group level hubs as those twelve brain regions (i.e.  
23 ~15%) that were most consistently identified across participants. We derived hub definitions  
24 for each age group and for the whole sample. Pairwise similarity between different hub  
25 definitions was assessed across hub-criteria and across age groups with the Jakkard index  
26 (Steen et al., 2011). The similarity of the hub definitions for all age groups according to the  
27 hub score criterion as assessed by the Jakkard index was plotted as a heatmap in MATLAB.  
28 We used the hub definitions to compute the average connection weight of hub regions, the  
29 average gray matter volume of hub regions, and normalized versions of these measures by  
30 dividing by hub connection weights (and hub gray matter volume respectively) by the mean  
31 connection weight (gray matter volume) across the entire brain.

## 32 **2.4 Statistical analysis**

33 Statistical analysis was performed in R Studio (version 1.3.1056, R version 4.0.2). All life-  
34 span changes were modelled with generalized additive mixed-effect models (GAMM; Lin &

1 Zhang, 1999) using the gamm4 toolbox. GAMMs are based on linear mixed-effect models  
2 (gamm4 is based on the lme4 package) but with multiple sinusoidal base functions, whose  
3 number is automatically selected during the modelling process and is represented by the  
4 estimated degree of freedom (EDF) of each respective model. This allows the modeling of  
5 non-linear relationships without any *a priori* assumptions on the model type. Similar to linear  
6 mixed-effect models, GAMMs can include factorial variables and random effects. We  
7 modelled age nonparametrically, with gender and disease status as factorial variables. The age  
8 of each age group was set to the mean value of the range it covers, therefore representing the  
9 participants in each age groups at the same age. Research center and participants were  
10 included as a random term. To assess differences between gender and patient groups, we set  
11 up additional models differentiating all factors of the respective variable. The used model  
12 function was:

13  $y \sim s(\text{Age, by Gender/DiseaseStatus/none}) + \text{Gender} + \text{DiseaseStatus} + (1 + \text{Participants} |$   
14  $\text{ResearchCenter})$

15 All models were plotted with the mgcv toolbox, including the 95 % confidence interval (CI)  
16 as shading. The fitted values and confidence intervals were extracted from the plotted models  
17 to assess peak values and their respective age value within the separate models.

18

## 19 **2.5 Code and data availability**

20 All data analyzed in the present report can be obtained upon request at [dutchconnecomelab.nl](http://dutchconnecomelab.nl).

21 All analysis scripts will be made available on the open science framework upon publication.

## 22 **3 Results**

### 23 **3.1 Rich club properties over the lifespan**

24 A significant rich club regime was present in the connectomes of  $N = 7,704$  participants (i.e.  
25 95.5%). All subsequently reported analyses on rich club organization are focused on this  
26 group. We evaluated six summary measures from the rich club curve: The normalized rich  
27 club coefficient at the peak of the curve (i.e. the maximum difference between the empirical  
28 rich club coefficient and the null models), the length of the rich club regime (i.e. the range of  
29 the degree distribution for which the empirical rich club coefficient exceeded the rich club  
30 coefficient in the null models), the number of nodes with a nodal degree equal to or larger  
31 than the nodal degree of the starting point of the rich club regime (i.e. the number of nodes  
32 which qualify for the rich club), the area under the normalized rich club curve above 1 (i.e.  
33 the combination of the rich club regime length and peak value), and the area under the

1 empirical and random rich club curves (i.e. the properties of the empirical and random  
2 networks defining the rich club property). Fitted values for all six measures across the lifespan  
3 and the control analyses with binary connectome matrices are shown in figure 1.  
4 GAMM-modeling revealed an increase in rich club organization across the lifespan: The peak  
5 of the normalized rich club curve increased with age (Figure 1A; EDF = 3.21, F = 18.92, p =  
6 1.39e-12), i.e. the difference between empirical rich club organization and rich club  
7 organization in random null networks became more pronounced. At its peak, the empirical  
8 rich club coefficient exceeded the null models' mean coefficient by a factor of  $3.66 \pm .05$  in  
9 childhood and by  $4.44 \pm .22$  in late adulthood. With increasing age, the rich club regime also  
10 became more widespread (Figure 1B; EDF = 3.684, F = 19.62, p = 1.76e-14), i.e., regions  
11 within the rich club would differ more in their nodal degree. The length of the rich club  
12 regime increased from  $17.1 \pm .72$  (mean  $\pm$  95 % CI) in childhood to  $20.1 \pm .79$  in late  
13 adulthood. Contrary to the increasing rich club regime, the number of nodes qualifying for the  
14 rich club decreased with age (Figure 1C; EDF = 3.68, F = 61.62, p < 2e-16), i.e., fewer nodes  
15 within the brain network show higher interconnectedness to other high degree nodes than  
16 expected by their nodal degree alone with increasing age. The number of nodes with a nodal  
17 degree equal to or larger than the nodal degree at the starting point of the rich club regime  
18 decreased from  $51.2 \pm 1.4$  in childhood to  $42.3 \pm 1.52$  in late adulthood. Of note, the observed  
19 increased difference for the rich club regime and peak value was also present in the whole  
20 area under the curve (Figure 1D, red; EDF = 2.96, F = 45.95, p < 2e-16), with an increase in  
21 the area under the curve above 1 from  $18.3 \pm 1.27$  in childhood to  $26.1 \pm 1.46$  in late  
22 adulthood, indicating that the rich club becomes relatively richer. The area under the  
23 empirical rich club curve (Figure 1D, black; EDF = 7.876, F = 25.32, p < 2e-16) and the  
24 random rich club curve (Figure 1D, gray; EDF = 4.739, F = 26.37, p < 2e-16) also increased  
25 with increasing age, but at different rates. The area under the empirical rich club curve  
26 increased from  $17.7 \pm .11$  at age 20 to  $19.7 \pm .43$  in late adulthood, while the area under the  
27 average random rich club curve only increased from  $14.6 \pm .09$  at age 17 to  $15.4 \pm .13$  in late  
28 adulthood, resulting in an increase of the overall rich club property with increasing age.  
29 As network metrics are known to relate to network density, we modelled average network  
30 density and maximum nodal degree over the lifespan. Here, no age effect was detectable for  
31 the average network density (Supplementary figure 1A; EDF = 1.784, F = 2.874, p = .0608)  
32 but the maximum nodal degree increased across the lifespan (Supplementary figure 1B; EDF  
33 = 6.45, F = 67.23, p < 2e-16). To control for the increase in maximum nodal degree across the  
34 lifespan we performed the rich club analyses also on binary connectome matrices. The peak of

1 the normalized binary rich club curve actually decreased with age (Figure 1E; EDF = 5.093, F  
 2 = 5.583,  $p = 3.39e-5$ ), but the area under the normalized (Figure 1F, red; EDF = 1.009, F =  
 3 316.4,  $p < 2e-16$ ), empirical (Figure 1F, black; EDF = 6.456, F = 97.93,  $p < 2e-16$ ) and  
 4 random (Figure 1F, gray; EDF = 7.004, F = 82.65,  $p < 2e-16$ ) binary rich club curves  
 5 increased. It must be noted though, that the overall quantity of the normalized rich club curve  
 6 peak value (childhood:  $1.29 \pm .02$ ; late adulthood:  $1.25 \pm .02$ ) and the area under the  
 7 normalized binary rich club curve (childhood:  $.06 \pm .09$ ; late adulthood:  $2.08 \pm .13$ ) was very  
 8 low. The latter is also represented by the very similar trajectory and quantity of the areas  
 9 under the empirical and random binary rich club curves and indicates little to no rich club  
 10 property observed using the binary connectome matrices. Taken together, these results show  
 11 that the observed increase in the peak value of the normalized weighted rich club curve is not  
 12 driven by the increase in the maximum nodal degree over the lifespan, as this increase would  
 13 have been observed using binary connectome matrices, whereas the increase in the area under  
 14 the different rich club curves and the rich club regime might in part be driven by this increase.  
 15 From these results we conclude that rich club organization in structural brain networks is  
 16 preserved over the lifespan, which is in contrast to previous reports suggesting a decrease or  
 17 an ‘inverted U’ shaped pattern.

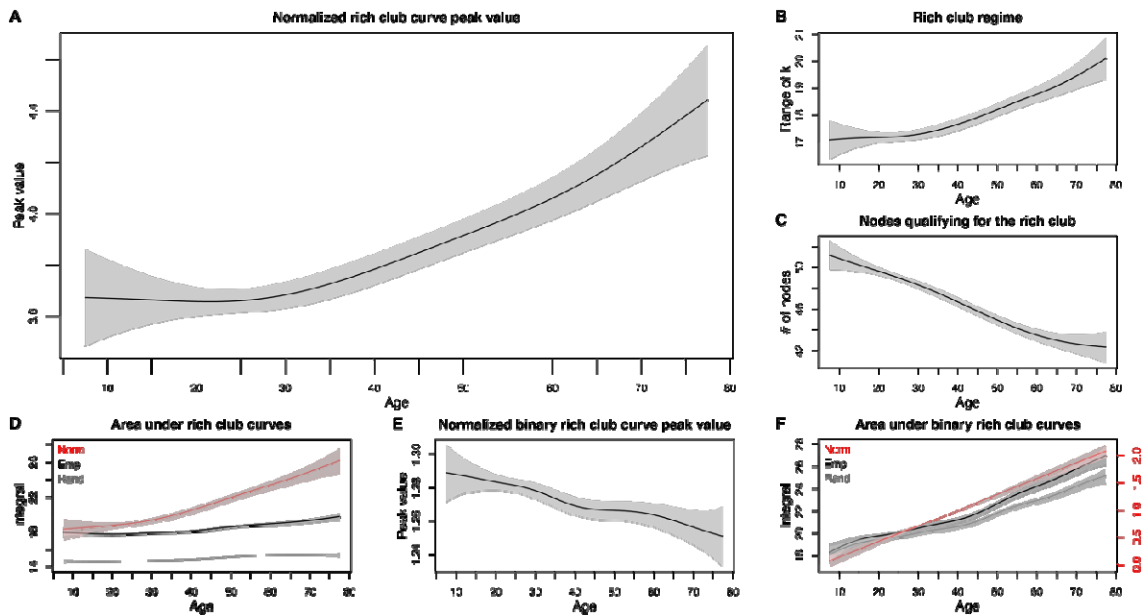

18  
 19 Figure 1: Rich club organization across the lifespan. Rich club organization as indexed by the maximal  
 20 normalized weighted rich club coefficient increases with age (A). The rich club regime becomes  
 21 longer with age, indicating a higher variance in nodal degree across rich club members (B) while the  
 22 size of the rich club in terms of implicated brain regions decreases with age (C). The overall increase  
 23 in rich club organization (area under the normalized rich club curve) is likely to result from a selective  
 24 sparing of connections between rich club members as indicated by a less steep increase of rich club

1 organization in the random null models (D). The analysis of binary versions of the networks (E and F)  
2 indicates that the observed changes in rich club organization are not reflected in the presence or  
3 absence of connections but rather reflect quantitative changes in connectivity strength. The color  
4 coding distinguishes the area under the normalized rich club curve (red) and areas under the rich club  
5 curve for the empirical networks (black) and the random null models (gray). Plotted are fitted values  
6 from GAMMs with 95% confidence intervals as shading.

### 7 **3.2 Hub regions over the lifespan**

8 We computed hub scores to classify brain regions into likely hubs and non-hubs for each  
9 individual in the data set (see methods). At the group level, we defined hubs as those twelve  
10 brain regions (~15%) that were most consistently classified as hubs at the individual level.  
11 This resulted in the following hub regions: left and right thalamus, left and right putamen, left  
12 and right superior frontal as well as superior parietal gyrus, left and right precuneus, and left  
13 and right insula (see table 2). Alternative methods for individual hub detection via nodal  
14 degree, the starting point of the rich club regime, or the peak value of the normalized rich club  
15 curve resulted in the same hub vs. non-hub partition (all pairwise Jaccard indices  $J = 1$ ). Only  
16 the hub definitions via the strength (weighted degree) distribution and via k-means clustering  
17 of the hub score centrality measures resulted in a slightly different group-level hub  
18 assignment comparing to all other criteria ( $J = .5$ , equivalent to 4/12 different hubs), but were  
19 more similar comparing to each other ( $J = .71$ , equivalent to 2/12 different hubs). Given the  
20 largely consistent results across partitioning approaches, we decided to retain the hub  
21 definition based on hub scores for further analyses. The partition of brain regions into hubs  
22 and non-hubs was highly similar across age groups (see figure 2), resulting in an identical hub  
23 vs. non-hub partition for almost all age groups (with hub regions as listed above; all pairwise  
24 Jaccard indices  $J = 1$ ). The only differences were observed in the age groups 5-10, 10-15, 15-  
25 20, and 75-80 ( $J = 0.85$ , equivalent to 1/12 different hubs, or  $J = .71$ , equivalent to 2/12  
26 different hubs).

27

28 **Table 2** Percent nodal participation in the top 15 % hub region for all participants according to the hub  
29 scores measure. Bold marks the top 12 nodes (~15 %), which are considered the group-level hubs.

| Number   | Node                        | Hub participation [%] |
|----------|-----------------------------|-----------------------|
| <b>1</b> | <b>Left putamen</b>         | <b>99,58</b>          |
| <b>2</b> | <b>Right putamen</b>        | <b>98,95</b>          |
| <b>3</b> | <b>Left superiorfrontal</b> | <b>95,96</b>          |
| <b>4</b> | <b>Left thalamus</b>        | <b>93,44</b>          |

|           |                               |              |
|-----------|-------------------------------|--------------|
| <b>5</b>  | <b>Right superiorfrontal</b>  | <b>92,86</b> |
| <b>6</b>  | <b>Left superiorparietal</b>  | <b>90,66</b> |
| <b>7</b>  | <b>Right superiorparietal</b> | <b>82,64</b> |
| <b>8</b>  | <b>Right thalamus</b>         | <b>77,52</b> |
| <b>9</b>  | <b>Right precuneus</b>        | <b>76,82</b> |
| <b>10</b> | <b>Left precuneus</b>         | <b>75,49</b> |
| <b>11</b> | <b>Left insula</b>            | <b>66,49</b> |
| <b>12</b> | <b>Right insula</b>           | <b>65,87</b> |
| 13        | Left caudate                  | 56,30        |
| 14        | Left rostralmiddlefrontal     | 52,83        |
| 15        | Left precentral               | 47,37        |
| 16        | Right rostralmiddlefrontal    | 42,98        |
| 17        | Right caudate                 | 33,35        |
| 18        | Left pallidum                 | 31,47        |
| 19        | Right precentral              | 25,84        |
| 20        | Left hippocampus              | 21,83        |
| 21        | Right pallidum                | 17,99        |
| 22        | Left superior temporal        | 15,77        |
| 23        | Left inferiorparietal         | 13,95        |
| 24        | Right hippocampus             | 13,33        |
| 25        | Left lateralorbitofrontal     | 11,03        |
| 26        | Left isthmuscingulate         | 10,96        |
| 27        | Right superior temporal       | 8,78         |
| 28        | Right isthmuscingulate        | 8,77         |
| 29        | Left postcentral              | 7,96         |
| 30        | Left lateraloccipital         | 7,85         |
| 31        | Right inferiorparietal        | 5,83         |
| 32        | Right lateralorbitofrontal    | 4,81         |
| 33        | Left medialorbitofrontal      | 4,04         |
| 34        | Left middletemporal           | 3,00         |
| 35        | Right posteriorcingulate      | 2,83         |
| 36        | Left posteriorcingulate       | 2,58         |
| 37        | Right lateraloccipital        | 2,16         |
| 38        | Right postcentral             | 1,38         |

|    |                                |      |
|----|--------------------------------|------|
| 39 | Right caudalanteriorcingulate  | 1,15 |
| 40 | Right rostralanteriorcingulate | 1,14 |
| 41 | Right medialorbitofrontal      | 1,12 |
| 42 | Right middletemporal           | 1,12 |
| 43 | Left rostralanteriorcingulate  | 1,03 |
| 44 | Left inferiortemporal          | 0,86 |
| 45 | Left fusiform                  | 0,82 |
| 46 | Right amygdala                 | 0,64 |
| 47 | Right fusiform                 | 0,58 |
| 48 | Left caudalanteriorcingulate   | 0,56 |
| 49 | Right frontalpole              | 0,56 |
| 50 | Right inferiortemporal         | 0,52 |
| 51 | Right lingual                  | 0,36 |
| 52 | Left lingual                   | 0,33 |
| 53 | Left frontalpole               | 0,30 |
| 54 | Left amygdala                  | 0,24 |
| 55 | Right paracentral              | 0,22 |
| 56 | Right pericalcarine            | 0,20 |
| 57 | Left cuneus                    | 0,19 |
| 58 | Left pericalcarine             | 0,19 |
| 59 | Left temporalpole              | 0,19 |
| 60 | Right cuneus                   | 0,19 |
| 61 | Left paracentral               | 0,17 |
| 62 | Right temporalpole             | 0,17 |
| 63 | Left parstriangularis          | 0,16 |
| 64 | Left caudalmiddlefrontal       | 0,10 |
| 65 | Right parsorbitalis            | 0,07 |
| 66 | Right parstriangularis         | 0,07 |
| 67 | Right accumbens area           | 0,06 |
| 68 | Left supramarginal             | 0,04 |
| 69 | Right supramarginal            | 0,04 |
| 70 | Left accumbens area            | 0,02 |
| 71 | Left bankssts                  | 0,01 |
| 72 | Left parsopercularis           | 0,01 |

|    |                           |      |
|----|---------------------------|------|
| 73 | Right caudalmiddlefrontal | 0,01 |
| 74 | Left entorhinal           | 0    |
| 75 | Left parahippocampal      | 0    |
| 76 | Left parsorbitalis        | 0    |
| 77 | Left transversetemporal   | 0    |
| 78 | Right bankssts            | 0    |
| 79 | Right entorhinal          | 0    |
| 80 | Right parahippocampal     | 0    |
| 81 | Right parsopercularis     | 0    |
| 82 | Right transversetemporal  | 0    |

1

2

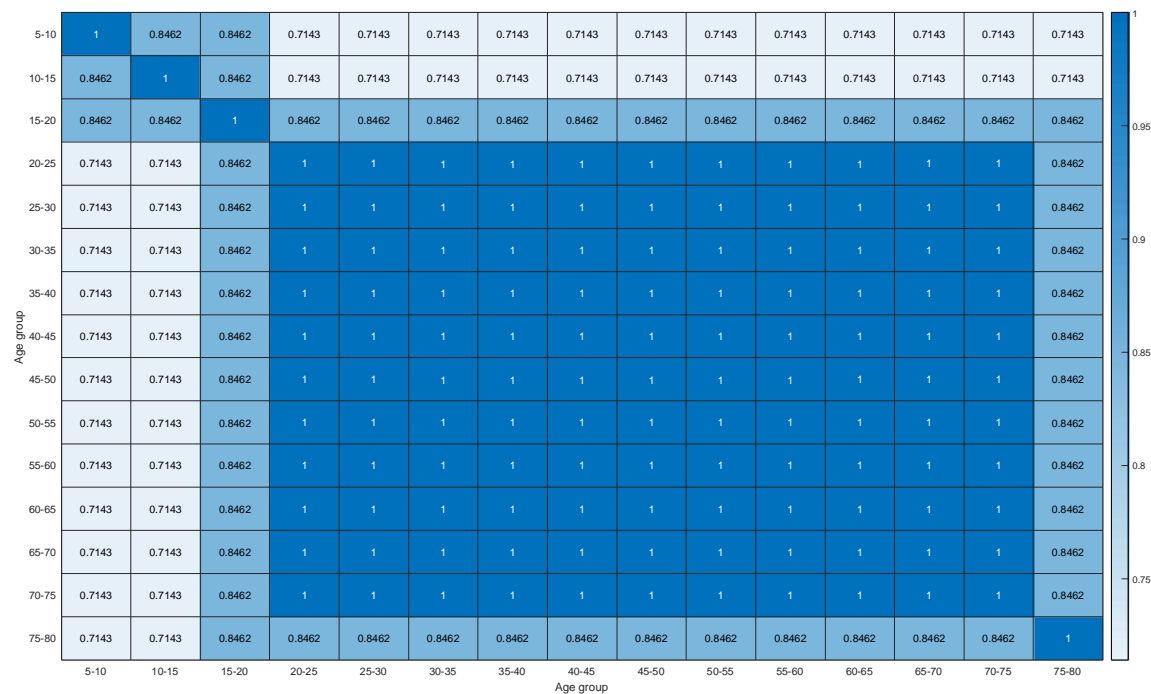

3

4 Figure 2: Similarity (expressed by the pairwise Jaccard index) of hub assignments (based on hub  
5 scores) between age groups.

### 6 3.3 Nodal and hub connectivity across the lifespan

7 We computed average connectivity in all individuals by averaging connection weights across  
8 all nodes or across all twelve hubs (see methods). Non-linear relationships between  
9 connectivity and participant's age were modelled with GAMMs for 8,066 participants  
10 between the ages of five to 80 years.



1 Average connectivity across brain regions varied significantly with age (Figure 3A; EDF =  
2 7.424,  $F = 45$ ,  $p < 2e-16$ ) and followed an ‘inverted U’ shaped trajectory across the lifespan.  
3 Average connectivity increased slightly from age 5 onwards, peaked at age 32, and showed a  
4 steep decline afterwards. We observed a similar trajectory for hub connectivity (Figure 3B;  
5 EDF = 4.961,  $F = 72.16$ ,  $p < 2e-16$ ) with a peak value at age 27. The direct comparison of hub  
6 connectivity and average connectivity indicated life span changes (Figure 3C; EDF = 6.537,  $F$   
7 = 40.46,  $p < 2e-16$ ): The relationship between hub- and average connectivity slightly  
8 increases between ages 5 and 22, with  $2.75 \pm .02$ -fold higher connectivity for hub regions at  
9 age 22. From 22 years onwards, the ratio between hub- and average connectivity decreased  
10 until age 67 to  $2.37 \pm 0.05$ -fold higher hub connectivity and again increased slightly  
11 afterwards. Please note that the decreasing ratio reflects relative changes in the connectivity of  
12 hubs vs. average connectivity and could be a consequence of the earlier apex of hub  
13 connectivity observable in the present data and as reported in previous work (Zhao et al.,  
14 2015). Unsurprisingly, the maximum connection weight demonstrated a very similar  
15 trajectory across the lifespan (Supplementary figure 1C; EDF = 6.402,  $F = 12.09$ ,  $p = 4.77e-$   
16 14).

17 As larger brain regions are more likely to be touched by more reconstructed streamlines, it is  
18 necessary to evaluate connectivity changes from the perspective of changes in regional gray  
19 matter volumes. We found regional brain volume to decrease across the life span (Figures 3D-  
20 E; all regions: EDF = 7.503,  $F = 369.9$ ,  $p < 2e-16$ ; hub regions: EDF = 7.645,  $F = 359.4$ ,  $p <$   
21  $2e-16$ ). The direct contrast of hub vs. whole brain regional volumes revealed small life span  
22 changes of the ratio (Figure 3F; EDF = 6.12,  $F = 3.769$ ,  $p = 8.81e-4$ ) that followed an  
23 ‘inverted U’ shaped trajectory. The fitted values, however, showed almost no difference with  
24 a minimum value of  $1.7 \pm .004$  and a maximum value of  $1.71 \pm .003$ , indicating little evidence  
25 for relative changes in hub regional volumes.

26 Given the life span changes of regional brain volume and the confound of the NOS measure  
27 with regional brain volume, we further modelled life span trajectories of SVD-weighted  
28 connectivity. SVD-weighted connectivity followed an ‘inverted U’ shaped trajectory similar  
29 to NOS-weighted connectivity. Both average and hub connectivity, however, had a more  
30 pronounced increase with a peak at age 37 (average connectivity) and age 36 (hub  
31 connectivity). After this, average connectivity decreased moderately and remained at a  
32 relatively high level, while hub connectivity showed a more rapid decline. This was also  
33 reflected in a decrease in the ratio between hub and average connectivity from  $1.65 \pm .01$  at  
34 age 21 to  $1.51 \pm .02$  at age 61. All three measures (average connectivity, hub connectivity,

1 ratio) increased again in late adulthood, with the average connectivity increasing further than  
 2 its original peak at age 37 (Figures 3G-I; all regions: EDF=6.477,  $F = 31.88$ ,  $p < 2e-16$ ; hub  
 3 regions: EDF = 7.271,  $F = 13.29$ ,  $p < 2e-16$ ; ratio: EDF=6.499,  $F = 20.38$ ,  $p < 2e-16$ ).  
 4 All hub analyses reported in this paragraph were based on the twelve brain regions that were  
 5 most consistently identified as hubs across the entire sample. Because of subtle differences in  
 6 hub regions in the age groups below 20 and above 75 (see figure 2), we explored two  
 7 alternative hub partitions: Treating only those nine brain regions as hubs that were identified  
 8 as hubs in each age group and using a group-specific hub definition of those twelve regions  
 9 most consistently identified as hubs in the respective age groups lead to highly similar results.  
 10 Please see the supplementary figure 2 for details.

11

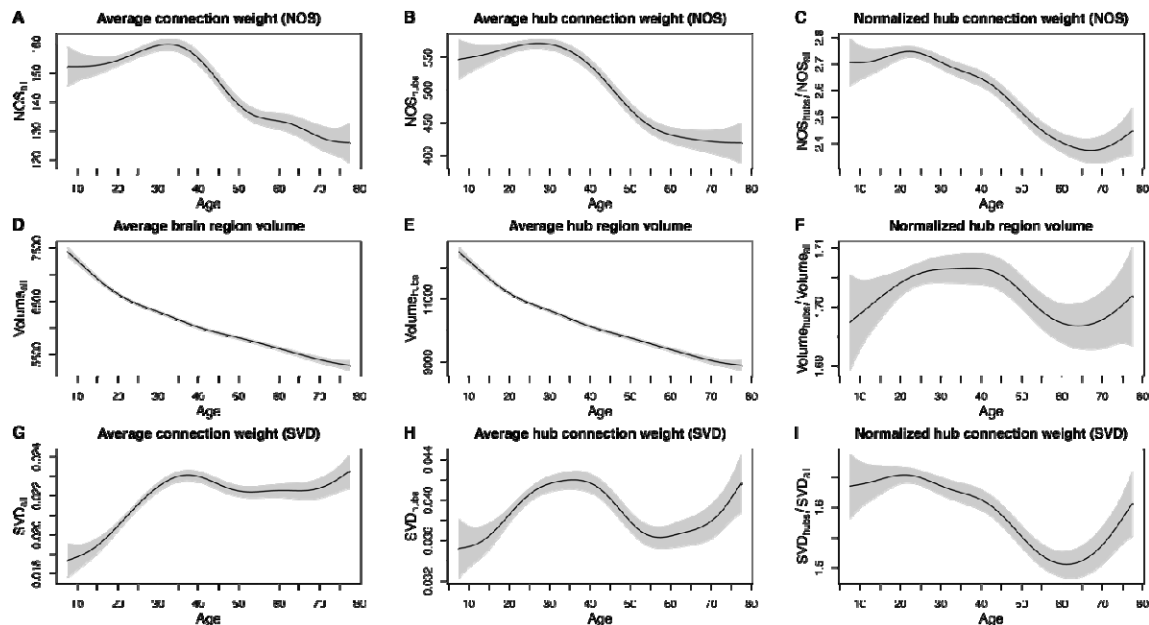

12

13 Figure 3: Average nodal and hub properties across the life span. Panels in rows correspond to: NOS-  
 14 connection weights (row 1, A-C), regional gray matter volume (row 2, D-F), and SVD-weighted  
 15 connection weights (row 3, G-I). Panels in columns refer to averages across all brain regions (column  
 16 1), averages across all hub regions (column 2), and averages of hub regions relative to all brain regions  
 17 (column 3). Plotted are fitted values from GAMMs with 95% confidence intervals shaded in gray.

18

### 19 3.4 Further analyses

20 All analyses reported above were statistically controlled for participants' gender and patient  
 21 status and for different study sites. We document fitted GAMM models for interactions  
 22 between age and gender, and between age and patient status in the supplementary material

1 (see supplementary figures 3-7). If not stated otherwise, all analyses reported above were  
2 based on weighted structural networks with NOS as connection weights. We document  
3 GAMM models for an alternative connection weight (i.e., FA) in the supplementary material  
4 (see supplementary figure 8).

5

## 6 **4 Discussion**

7 We present a cross-sectional analysis of life span trajectories of structural brain networks in N  
8 = 8,066 individuals aged 5 to 80. Our main findings are: 1) Structural connectivity across  
9 brain areas in general, and of highly connected hub regions in particular, follows an ‘inverted  
10 U’ shaped trajectory with an increase until middle adulthood and a decline afterwards, 2)  
11 regional gray matter volume decreases with age, and 3) rich club organization of the structural  
12 connectome is conserved across the life span. While the first two observations are  
13 confirmatory findings for previous literatures, the finding of conserved rich club organization  
14 is a novel discovery with implications for healthy brain aging, and neurological as well as  
15 cognitive reserve.

16

### 17 *Life-span trajectories in structural brain networks*

18 The ‘inverted U’ shaped trajectory in structural connectivity confirms previous reports that  
19 either showed a similar trajectory across the life span (Kochunov et al., 2012; Zhao et al.,  
20 2015), or revealed consistent changes across selected age ranges such as increase in structural  
21 connectivity across childhood and adolescence (Hagman et al., 2008; Baker et al., 2015;  
22 Wierenga et al., 2015), or decrease in measures of white matter integrity from middle to late  
23 adulthood (Burzynska et al., 2010; Gong et al., 2009; Otte et al., 2015). The observed  
24 decrease in gray matter volumes is consistent with a large body of literature that reports such  
25 structural decline across the life-span (see Sowell et al., 2003, and Sowell et al., 2004, for  
26 review). Structural rich club organization has been shown to increase during childhood and  
27 adolescence (Baker et al., 2015; Wierunga et al., 2018), which is consistent with the present  
28 findings. One previous life span study, however, has described decreasing rich club  
29 organization in structural brain networks across the life span, an opposite pattern to the  
30 present finding, while reporting a similar ‘inverted U’ shaped trajectory for structural  
31 connectivity of hub regions (Zhao et al., 2015). This study, however, did only evaluate the  
32 normalized rich club coefficient at one statistically defined degree-level. The present findings

1 provide a more detailed analysis by integrating rich club coefficients across the entire rich  
2 club regime derived from the normalized rich club curve.

3 Many network neuroscience studies define the rich club as a group of highly interconnected  
4 hub regions. Rich clubs, however, are not necessarily a nodal property of a few highly  
5 connected brain regions. Rather, the rich club reflects the organizational principle of the entire  
6 network that nodes prefer connecting to other nodes of equal or higher degree (van den  
7 Heuvel & Sporns, 2011). We found that rich club organization of the network as a whole is  
8 not only preserved but becomes even more pronounced in late adulthood. At first glance, this  
9 might appear at odds with the observed connectivity decrease of the most pronounced hub  
10 regions which started even earlier than the decrease in average connectivity across all nodes,  
11 as visible in the declining ratio of hub- over average connectivity (see figure 3C). The  
12 normalized rich club coefficient which quantifies rich club organization, however, relies on a  
13 within-subject comparison of empirical rich club connectivity with random network null  
14 models. The null networks are obtained by randomly shuffling edges while preserving the  
15 strength distribution of network nodes and are therefore similarly affected by changes in  
16 average connectivity. Our main finding of stronger rich club organization in older age is  
17 therefore a likely result from a targeted sparing of relevant connections of rich club members.  
18 Support for this explanation comes from the separate modeling of the empirical and random  
19 rich club curve across age: The increase of the empirical rich club curve is steeper than the  
20 random curve which leads to higher normalized rich club coefficients (see figure 1D). A  
21 second explanation is the decreasing number of nodes qualifying for club membership (figure  
22 1C): Rich club coefficients become larger when fewer nodes are retained at a given threshold  
23  $k$ , a pattern that also contributes to preserved rich club organization in Alzheimer's disease  
24 (Daianu et al., 2013). It is important to note, however, that we only found an age-related  
25 increase in rich club organization when analyzing weighted networks. No such effect was  
26 observable in binary versions of the networks that only distinguished whether regions were  
27 connected by reconstructed fiber tracts but did not contain information on connectivity  
28 strength. The age-related increase in rich club organization is thus mainly reflected in a  
29 change of connectivity strength rather than in a qualitative remodeling of the brain network  
30 which would imply a loss of existing or a (biologically implausible) creation of new  
31 connections.

32

33 *Development of rich club organization - First come, served last?*

1 The process of aging has been described as reversed ontology, where the last systems to  
2 mature are the first to decline. This observation of retrogenesis has been discussed in the  
3 context of dementia (Reisberg et al., 1999) but also regarding normal aging (Tamnes et al.,  
4 2013; Toga et al., 2006), together with the implicit assumption that the higher plasticity of  
5 late-maturing structures leaves them more vulnerable to degeneration. When also considering  
6 previous findings on rich club organization across childhood, the current observation that rich  
7 club organization is not only retained but enhanced in aging aligns with the concept of  
8 retrogenesis and suggests that rich club organization develops in a “first come, served last”  
9 principle across the lifespan. Rich club organization in structural brain networks has been  
10 observed as early as gestational week 30, suggesting that relevant connections are among the  
11 first that are created in the developing brain (Ball et al., 2014). Rich club organization remains  
12 stable between child- and adulthood (Grayson et al., 2014) and, according to our present  
13 finding, increases with advancing age, presumably due to a targeted sparing of relevant  
14 connections from age-related decline. It remains open, however, if the persistence of rich club  
15 organization from the prenatal period to elderliness is supported by the same fiber connections  
16 and is thus a systems-level consequence of local developmental trajectories, or whether the  
17 organizational principle of the brain network is preserved through a systems-level  
18 reorganization.

19 While the current investigation looked solely into anatomical principles of structural brain  
20 network development, the rich club finding may still have important implications for brain  
21 function and cognitive aging. Higher rich club organization in the aging connectome could  
22 reflect a form of neural reserve or compensation to maintain function (Fornito et al., 2015). It  
23 has, for instance, been shown that stronger rich club organization in middle and late adulthood  
24 relates to better performance in cognitive domains (Baggio et al., 2015). The rich club  
25 provides a communication backbone which is relevant for the integration of segregated  
26 functional networks (de Reus & van den Heuvel, 2014; van den Heuvel & Sporns, 2013; van  
27 den Heuvel et al., 2012). The functional brain network seems to become less modular and  
28 more segregated in aging (Cao et al., 2014; Geerligs et al., 2015), and it has been suggested  
29 that the modular reorganization of the brain network could reflect compensatory efforts to  
30 maintain function in old age (Song et al., 2014). This could be attributable to the stronger rich  
31 club organization of the aging brain. The distinction between nodal changes and network-  
32 level changes has also been noted regarding network efficiency: Local efficiency, i.e. the  
33 inverse of the average shortest path of one node to its neighbors, declines with age, while  
34 global efficiency, i.e. the inverse of the average shortest path in the entire network, is typically

1 unaffected (Cao et al., 2014; Geerligs et al., 2015; Song et al., 2014). From a methodological  
2 perspective, it is important to note that we did not observe age-related changes in network  
3 density. Network density can have marked influences on network metrics in brain networks  
4 (van Wijk et al., 2010) and needs to be accounted for when comparing different groups (van  
5 den Heuvel et al., 2017). Unfortunately, our present data set did not include cognitive or other  
6 function-related outcome measures. We can therefore only speculate whether preserved or  
7 increased rich club organization in the aging brain comes with functional benefits such as  
8 slower cognitive aging or a higher overall-functionality. This, however, would be an exciting  
9 prospect.

#### 10 *Methodological considerations*

11 Both linear and non-linear life span trajectories for brain development have been reported in  
12 the literature (Faghiri et al., 2019; Ziegler et al., 2012). Trajectories have often been described  
13 to follow an ‘inverted U’, but this does not necessarily imply strict quadratic development and  
14 it is generally recommended against parametric statistical models when modeling brain  
15 development as a function of age (Fjell et al., 2010). We addressed this issue by adapting  
16 generalized additive mixed-effect modeling (Wood & Scheipl, 2017). GAMMs are well suited  
17 to model life span brain trajectories (Sørensen et al., 2021; Walhovd et al., 2016) because they  
18 do not enforce parametric representations of age-brain relationships while additionally  
19 allowing fixed and random linear effect structures to control for possible confounds such as  
20 sex, patient status, and study site.

21 Through the 10kin1day data set, we were able to utilize the largest openly available structural  
22 connectome data set and to increase the sample size substantially in comparison to previous  
23 studies. The resulting increase in statistical power addresses a crucial methodological issue in  
24 neuroimaging (Button et al., 2013), particularly in the field of individual differences (Dubois  
25 & Adolphs, 2016). Achieving such sample size is virtually impossible without curated data  
26 from large consortia (Miller et al., 2016; Thompson et al., 2020; Van Essen et al., 2013), or  
27 open data sharing (Poldrack & Gorgolewski, 2014; Poline et al., 2012), an approach we  
28 benefited from in the present study. Through collaborative data sharing and unified  
29 preprocessing, the 10kin1day data set adapts an approach that has previously been  
30 successfully applied to functional brain networks (Bellec et al., 2017; Biswal et al., 2010).  
31 Connectome matrices from 10kin1day data show high correspondence with connectome  
32 matrices from the Human Connectome Project (HCP) which provides strong support for the  
33 validity of data (van den Heuvel et al., 2019). Nevertheless, combining imaging data from  
34 several centers comes of course with several challenges that cannot be fully compensated by



1 the increase in sample size: Participants were scanned at different centers with different  
2 acquisition protocols and at different field strength. We were only able to control statistically  
3 for different study sites and cannot exclude the possibility of selection biases regarding  
4 different age groups at different centers. The apparent increase in connectivity in SVD-  
5 weighted connectomes after age 60, for instance, is likely a selection bias towards higher  
6 functional status in older participants, which is a common problem with convenience samples  
7 in aging research (Hultsch et al., 2002). Furthermore, the data set includes patient and non-  
8 patient data and no further information on specific diagnoses or assessments is given. We  
9 decided to include all participants and to control statistically for patient status. We are  
10 optimistic that the observed trajectories apply to both healthy people and people with  
11 neurological or psychiatric disorders. A more careful perspective on different conditions,  
12 however, would have been desirable. Lastly, the age variable was only available in bins (i.e.,  
13 in age groups spanning five years). While this is an important measure towards protecting  
14 participants' identity in a shared and widely accessible data set, it is of course a short coming  
15 when addressing developmental research questions. Lastly, we need to emphasize that our  
16 results rely on a cross-sectional comparison which cannot exclude cohort effects and does not  
17 allow for inferences on causality or the succession of age-associated alterations in network  
18 organization. We would therefore consider our current findings as tentative and encourage  
19 replication, for instance with data from the HCP lifespan project (Bookheimer et al., 2019) or  
20 in combined cross-sectional and longitudinal designs (Fotinos et al., 2005).

### 21 *Brain aging*

22 The present study adds to the literature on changes in brain structure and organization across  
23 the life span. While early and late-life development of the structural connectome have been  
24 studied in isolation before, only few studies have taken a life-span perspective from early  
25 childhood to late adulthood in one data set. Taking a life-span perspective on brain  
26 development, however, is crucial as the pattern of early-life development and late-life decline  
27 shows a certain degree of overlap (Tamnes et al., 2013) and early-life development seems to  
28 set the stage for late-life decline (Deary et al., 2006; Walhovd et al., 2016). While previous  
29 studies also suggest an 'inverted U' shaped trajectory of white matter connectivity (Kochunov  
30 et al., 2012; Zhao et al., 2015), the apex of the developmental curves was found to vary  
31 between the late 20s and early 30s. Our data from a larger sample suggest that decline in  
32 average connectivity and hub connectivity might even begin a few years later. Future work  
33 will want to address the question how such decline is triggered, if there are ways to slow it  
34 down, and at which point possible interventions would be most effective. The biological aging

1 process is characterized by a build-up of damage and limits of somatic maintenance  
2 throughout adulthood (Ferrucci et al., 2020; Hamczyk et al., 2020; Kirkwood, 2005). This  
3 leaves aging as a major risk factor for several prevalent conditions (Niccoli & Partridge,  
4 2012), including neurodegenerative disorders whose incidence increase dramatically in older  
5 age (Querfurth & LaFerla, 2010). Timed interventions at an age where no functional loss has  
6 occurred as of yet might be most effective towards counteracting developmental decline and  
7 prolonging health over the lifespan (Ferrucci et al., 2020). It is an important observation in  
8 life-span research that age-related loss of function is highly individual (Lindenberger, 2014).  
9 While some individuals seem to age early, others maintain a high level of functioning into  
10 very old age. Several studies have therefore followed the approach to estimate individual  
11 brain age, which is thought to reflect the aging process better than chronological age (Cole &  
12 Franke, 2017; Franke & Gaser, 2019). The current data set did not allow us to adapt a similar  
13 individualized approach and assess individual differences in aging trajectories. We encourage  
14 future work into this direction, particularly regarding our finding of increasing rich club  
15 organization throughout life. If increasing rich club organization was indeed a compensatory  
16 effort to maintain functional capacity as structural connectivity strength decreases, it should  
17 become particularly pronounced in individuals who age faster.

## 18 *Conclusion*

19 We utilized the largest developmental sample with structural connectomes across the life span  
20 so far and applied non-linear statistical modeling to study life span trajectories of brain  
21 connectivity, network hubs, and rich club organization in the structural connectome. We  
22 confirmed ‘inverted U’ shaped trajectories for brain connectivity, found highly consistent  
23 network hubs across age groups, and found that rich club organization may remain relatively  
24 preserved in the aging brain. This might have implications for neural reserve and resilience in  
25 the aging brain and individual differences in biological and cognitive aging.

26



## 1 **6 Bibliography**

- 2 Baggio, H. C., Segura, B., Junque, C., de Reus, M. A., Sala-Llonch, R., & Van den Heuvel,  
3 M. P. (2015). Rich Club Organization and Cognitive Performance in Healthy Older  
4 Participants. *Journal of Cognitive Neuroscience*, 1–10.  
5 [https://doi.org/10.1162/jocn\\_a\\_00821](https://doi.org/10.1162/jocn_a_00821)
- 6 Baker, S. T. E., Lubman, D. I., Yucel, M., Allen, N. B., Whittle, S., Fulcher, B. D., Zalesky,  
7 A., & Fornito, A. (2015). Developmental Changes in Brain Network Hub Connectivity  
8 in Late Adolescence. *Journal of Neuroscience*, 35(24), 9078–9087.  
9 <https://doi.org/10.1523/JNEUROSCI.5043-14.2015>
- 10 Ball, G., Aljabar, P., Zebari, S., Tusor, N., Arichi, T., Merchant, N., Robinson, E. C.,  
11 Ogundipe, E., Rueckert, D., Edwards, A. D., & Counsell, S. J. (2014). Rich-club  
12 organization of the newborn human brain. *Proceedings of the National Academy of  
13 Sciences of the United States of America*, 111(20), 7456–7461.  
14 <https://doi.org/10.1073/pnas.1324118111>
- 15 Bellec, P., Chu, C., Chouinard-Decorte, F., Benhajali, Y., Margulies, D. S., & Craddock, R.  
16 C. (2017). The Neuro Bureau ADHD-200 Preprocessed repository. *NeuroImage*, 144,  
17 275–286. <https://doi.org/10.1016/j.neuroimage.2016.06.034>
- 18 Benjamini, Y., & Hochberg, Y. (1995). Controlling the False Discovery Rate: A Practical and  
19 Powerful Approach to Multiple Testing. *Journal of the Royal Statistical Society:  
20 Series B (Methodological)*, 57(1), 289–300. [https://doi.org/10.1111/j.2517-  
21 6161.1995.tb02031.x](https://doi.org/10.1111/j.2517-6161.1995.tb02031.x)
- 22 Bertolero, M. A., Yeo, B. T. T., & D’Esposito, M. (2015). The modular and integrative  
23 functional architecture of the human brain. *Proceedings of the National Academy of  
24 Sciences*, 112(49), E6798–E6807. <https://doi.org/10.1073/pnas.1510619112>
- 25 Biswal, B. B., Mennes, M., Zuo, X.-N., Gohel, S., Kelly, C., Smith, S. M., Beckmann, C. F.,  
26 Adelstein, J. S., Buckner, R. L., Colcombe, S., Dagonowski, A.-M., Ernst, M., Fair,

- 1 D., Hampson, M., Hoptman, M. J., Hyde, J. S., Kiviniemi, V. J., Kötter, R., Li, S.-J.,  
2 ... Milham, M. P. (2010). Toward discovery science of human brain function.  
3 *Proceedings of the National Academy of Sciences of the United States of America*,  
4 *107*(10), 4734–4739. <https://doi.org/10.1073/pnas.0911855107>
- 5 Bookheimer, S. Y., Salat, D. H., Terpstra, M., Ances, B. M., Barch, D. M., Buckner, R. L.,  
6 Burgess, G. C., Curtiss, S. W., Diaz-Santos, M., Elam, J. S., Fischl, B., Greve, D. N.,  
7 Hagy, H. A., Harms, M. P., Hatch, O. M., Hedden, T., Hodge, C., Japardi, K. C.,  
8 Kuhn, T. P., ... Yacoub, E. (2019). The Lifespan Human Connectome Project in  
9 Aging: An overview. *NeuroImage*, *185*, 335–348.  
10 <https://doi.org/10.1016/j.neuroimage.2018.10.009>
- 11 Bullmore, E., & Sporns, O. (2009). Complex brain networks: Graph theoretical analysis of  
12 structural and functional systems. *Nature Reviews Neuroscience*, *10*(3), 186–198.  
13 <https://doi.org/10.1038/nrn2575>
- 14 Burzynska, A. Z., Preuschhof, C., Bäckman, L., Nyberg, L., Li, S.-C., Lindenberger, U., &  
15 Heekeren, H. R. (2010). Age-related differences in white matter microstructure:  
16 Region-specific patterns of diffusivity. *NeuroImage*, *49*(3), 2104–2112.  
17 <https://doi.org/10.1016/j.neuroimage.2009.09.041>
- 18 Button, K. S., Ioannidis, J. P. A., Mokrysz, C., Nosek, B. A., Flint, J., Robinson, E. S. J., &  
19 Munafò, M. R. (2013). Power failure: Why small sample size undermines the  
20 reliability of neuroscience. *Nature Reviews Neuroscience*, *14*(5), 365–376.  
21 <https://doi.org/10.1038/nrn3475>
- 22 Cao, M., Wang, J.-H., Dai, Z.-J., Cao, X.-Y., Jiang, L.-L., Fan, F.-M., Song, X.-W., Xia, M.-  
23 R., Shu, N., Dong, Q., Milham, M. P., Castellanos, F. X., Zuo, X.-N., & He, Y.  
24 (2014). Topological organization of the human brain functional connectome across the  
25 lifespan. *Developmental Cognitive Neuroscience*, *7*, 76–93.  
26 <https://doi.org/10.1016/j.dcn.2013.11.004>

- 1 Cohen, J. R., & D'Esposito, M. (2016). The Segregation and Integration of Distinct Brain  
2 Networks and Their Relationship to Cognition. *Journal of Neuroscience*, *36*(48),  
3 12083–12094. <https://doi.org/10.1523/JNEUROSCI.2965-15.2016>
- 4 Cole, J. H., & Franke, K. (2017). Predicting Age Using Neuroimaging: Innovative Brain  
5 Ageing Biomarkers. *Trends in Neurosciences*, *40*(12), 681–690.  
6 <https://doi.org/10.1016/j.tins.2017.10.001>
- 7 Collin, G., Sporns, O., Mandl, R. C. W., & van den Heuvel, M. P. (2014). Structural and  
8 functional aspects relating to cost and benefit of rich club organization in the human  
9 cerebral cortex. *Cerebral Cortex*, *24*(9), 2258–2267.  
10 <https://doi.org/10.1093/cercor/bht064>
- 11 Daianu, M., Dennis, E. L., Jahanshad, N., Nir, T. M., Toga, A. W., Jack, C. R., Weiner, M.  
12 W., & Thompson, P. M. (2013). *Alzheimer's disease disrupts rich club organization in*  
13 *brain connectivity networks*. 266–269. <https://doi.org/10.1109/ISBI.2013.6556463>
- 14 de Reus, M. A., & van den Heuvel, M. P. (2014). Simulated rich club lesioning in brain  
15 networks: A scaffold for communication and integration? *Frontiers in Human*  
16 *Neuroscience*, *8*, 647. <https://doi.org/10.3389/fnhum.2014.00647>
- 17 Deary, I. J., Bastin, M. E., Pattie, A., Clayden, J. D., Whalley, L. J., Starr, J. M., & Wardlaw,  
18 J. M. (2006). White matter integrity and cognition in childhood and old age.  
19 *Neurology*, *66*(4), 505–512. <https://doi.org/10.1212/01.wnl.0000199954.81900.e2>
- 20 Desikan, R. S., Ségonne, F., Fischl, B., Quinn, B. T., Dickerson, B. C., Blacker, D., Buckner,  
21 R. L., Dale, A. M., Maguire, R. P., Hyman, B. T., Albert, M. S., & Killiany, R. J.  
22 (2006). An automated labeling system for subdividing the human cerebral cortex on  
23 MRI scans into gyral based regions of interest. *NeuroImage*, *31*(3), 968–980.  
24 <https://doi.org/10.1016/j.neuroimage.2006.01.021>
- 25 Dubois, J., & Adolphs, R. (2016). Building a Science of Individual Differences from fMRI.  
26 *Trends in Cognitive Sciences*, *0*(0). <https://doi.org/10.1016/j.tics.2016.03.014>

- 1 Faghiri, A., Stephen, J. M., Wang, Y.-P., Wilson, T. W., & Calhoun, V. D. (2019). Brain  
2 Development Includes Linear and Multiple Nonlinear Trajectories: A Cross-Sectional  
3 Resting-State Functional Magnetic Resonance Imaging Study. *Brain Connectivity*,  
4 9(10), 777–788. <https://doi.org/10.1089/brain.2018.0641>
- 5 Ferrucci, L., Gonzalez-Freire, M., Fabbri, E., Simonsick, E., Tanaka, T., Moore, Z., Salimi,  
6 S., Sierra, F., & Cabo, R. (2020). Measuring biological aging in humans: A quest.  
7 *Aging Cell*, 19(2). <https://doi.org/10.1111/acel.13080>
- 8 Fischl, B., van der Kouwe, A., Destrieux, C., Halgren, E., Ségonne, F., Salat, D. H., Busa, E.,  
9 Seidman, L. J., Goldstein, J., Kennedy, D., Caviness, V., Makris, N., Rosen, B., &  
10 Dale, A. M. (2004). Automatically parcellating the human cerebral cortex. *Cerebral*  
11 *Cortex (New York, N.Y. □: 1991)*, 14(1), 11–22.
- 12 Fjell, Anders. M., Walhovd, K. B., Westlye, L. T., Østby, Y., Tamnes, C. K., Jernigan, T. L.,  
13 Gamst, A., & Dale, A. M. (2010). When does brain aging accelerate? Dangers of  
14 quadratic fits in cross-sectional studies. *NeuroImage*, 50(4), 1376–1383.  
15 <https://doi.org/10.1016/j.neuroimage.2010.01.061>
- 16 Fornito, A., Zalesky, A., & Breakspear, M. (2015). The connectomics of brain disorders.  
17 *Nature Reviews Neuroscience*, 16(3), 159–172. <https://doi.org/10.1038/nrn3901>
- 18 Fotenos, A. F., Snyder, A. Z., Girton, L. E., Morris, J. C., & Buckner, R. L. (2005).  
19 Normative estimates of cross-sectional and longitudinal brain volume decline in aging  
20 and AD. *Neurology*, 64(6), 1032–1039.  
21 <https://doi.org/10.1212/01.WNL.0000154530.72969.11>
- 22 Franke, K., & Gaser, C. (2019). Ten Years of BrainAGE as a Neuroimaging Biomarker of  
23 Brain Aging: What Insights Have We Gained? *Frontiers in Neurology*, 10.  
24 <https://doi.org/10.3389/fneur.2019.00789>

- 1 Geerligs, L., Renken, R. J., Saliassi, E., Maurits, N. M., & Lorist, M. M. (2015). A Brain-Wide  
2 Study of Age-Related Changes in Functional Connectivity. *Cerebral Cortex*, 25(7),  
3 1987–1999. <https://doi.org/10.1093/cercor/bhu012>
- 4 Gong, G., He, Y., Concha, L., Lebel, C., Gross, D. W., Evans, A. C., & Beaulieu, C. (2009).  
5 Mapping Anatomical Connectivity Patterns of Human Cerebral Cortex Using In Vivo  
6 Diffusion Tensor Imaging Tractography. *Cerebral Cortex*, 19(3), 524–536.  
7 <https://doi.org/10.1093/cercor/bhn102>
- 8 Grayson, D. S., Ray, S., Carpenter, S., Iyer, S., Dias, T. G. C., Stevens, C., Nigg, J. T., & Fair,  
9 D. A. (2014). Structural and Functional Rich Club Organization of the Brain in  
10 Children and Adults. *PLoS ONE*, 9(2), e88297.  
11 <https://doi.org/10.1371/journal.pone.0088297>
- 12 Groppe, D. (2020). *Fdr\_bh* [Matlab].
- 13 Hagmann, P. (2005). *From diffusion MRI to brain connectomics* [PhD Thesis, Université de  
14 Lausanne]. [http://biblion.epfl.ch/EPFL/theses/2005/3230/EPFL\\_TH3230.pdf](http://biblion.epfl.ch/EPFL/theses/2005/3230/EPFL_TH3230.pdf)
- 15 Hagmann, P., Cammoun, L., Gigandet, X., Meuli, R., Honey, C. J., Wedeen, V. J., & Sporns,  
16 O. (2008). Mapping the structural core of human cerebral cortex. *PLoS Biology*, 6(7),  
17 e159.
- 18 Hagmann, P., Kaurant, M., Gigandet, X., Thiran, P., Wedeen, V. J., Meuli, R., & Thiran, J.-P.  
19 (2007). Mapping human whole-brain structural networks with diffusion MRI. *PLoS*  
20 *One*, 2(7), e597.
- 21 Hagmann, P., Sporns, O., Madan, N., Cammoun, L., Pienaar, R., Wedeen, V. J., Meuli, R.,  
22 Thiran, J.-P., & Grant, P. E. (2010). White matter maturation reshapes structural  
23 connectivity in the late developing human brain. *Proceedings of the National Academy*  
24 *of Sciences*, 107(44), 19067–19072. <https://doi.org/10.1073/pnas.1009073107>

- 1 Hamczyk, M. R., Nevado, R. M., Baretino, A., Fuster, V., & Andrés, V. (2020). Biological  
2 Versus Chronological Aging. *Journal of the American College of Cardiology*, 75(8),  
3 919–930. <https://doi.org/10.1016/j.jacc.2019.11.062>
- 4 van den Heuvel, M. P., & Sporns, O. (2013). An Anatomical Substrate for Integration among  
5 Functional Networks in Human Cortex. *Journal of Neuroscience*, 33(36), 14489–  
6 14500. <https://doi.org/10.1523/JNEUROSCI.2128-13.2013>
- 7 Hultsch, D. F., MacDonald, S. W. S., Hunter, M. A., Maitland, S. B., & Dixon, R. A. (2002).  
8 Sampling and generalisability in developmental research: Comparison of random and  
9 convenience samples of older adults. *International Journal of Behavioral*  
10 *Development*, 26(4), 345–359. <https://doi.org/10.1080/01650250143000247>
- 11 Kirkwood, T. B. L. (2005). Understanding the Odd Science of Aging. *Cell*, 120(4), 437–447.  
12 <https://doi.org/10.1016/j.cell.2005.01.027>
- 13 Kochunov, P., Williamson, D. E., Lancaster, J., Fox, P., Cornell, J., Blangero, J., & Glahn, D.  
14 C. (2012). Fractional anisotropy of water diffusion in cerebral white matter across the  
15 lifespan. *Neurobiology of Aging*, 33(1), 9–20.  
16 <https://doi.org/10.1016/j.neurobiolaging.2010.01.014>
- 17 Lin, X., & Zhang, D. (1999). Inference in generalized additive mixed models by using  
18 smoothing splines. *Journal of the Royal Statistical Society: Series B (Statistical*  
19 *Methodology)*, 61(2), 381–400. <https://doi.org/10.1111/1467-9868.00183>
- 20 Lindenberger, U. (2014). Human cognitive aging: Corriger la fortune? *Science*, 346(6209),  
21 572–578. <https://doi.org/10.1126/science.1254403>
- 22 Markett, S., Jawinski, P., Kirsch, P., & Gerchen, M. F. (2020). Specific and segregated  
23 changes to the functional connectome evoked by the processing of emotional faces: A  
24 task-based connectome study. *Scientific Reports*, 10(1).  
25 <https://doi.org/10.1038/s41598-020-61522-0>

- 1 Miller, K. L., Alfaro-Almagro, F., Bangerter, N. K., Thomas, D. L., Yacoub, E., Xu, J.,  
2 Bartsch, A. J., Jbabdi, S., Sotiropoulos, S. N., Andersson, J. L. R., Griffanti, L.,  
3 Douaud, G., Okell, T. W., Weale, P., Dragonu, I., Garratt, S., Hudson, S., Collins, R.,  
4 Jenkinson, M., ... Smith, S. M. (2016). Multimodal population brain imaging in the  
5 UK Biobank prospective epidemiological study. *Nature Neuroscience*, *19*(11), 1523.  
6 <https://doi.org/10.1038/nn.4393>
- 7 Mori, S., Crain, B. J., Chacko, V. P., & Zijl, P. C. M. V. (1999). Three-dimensional tracking  
8 of axonal projections in the brain by magnetic resonance imaging. *Annals of*  
9 *Neurology*, *45*(2), 265–269. [https://doi.org/10.1002/1531-](https://doi.org/10.1002/1531-8249(199902)45:2<265::AID-ANA21>3.0.CO;2-3)  
10 [8249\(199902\)45:2<265::AID-ANA21>3.0.CO;2-3](https://doi.org/10.1002/1531-8249(199902)45:2<265::AID-ANA21>3.0.CO;2-3)
- 11 Niccoli, T., & Partridge, L. (2012). Ageing as a Risk Factor for Disease. *Current Biology*,  
12 *22*(17), R741–R752. <https://doi.org/10.1016/j.cub.2012.07.024>
- 13 Otte, W. M., van Diessen, E., Paul, S., Ramaswamy, R., Subramanyam Rallabandi, V. P.,  
14 Stam, C. J., & Roy, P. K. (2015). Aging alterations in whole-brain networks during  
15 adulthood mapped with the minimum spanning tree indices: The interplay of density,  
16 connectivity cost and life-time trajectory. *NeuroImage*, *109*, 171–189.  
17 <https://doi.org/10.1016/j.neuroimage.2015.01.011>
- 18 Park, H.-J., & Friston, K. (2013). Structural and Functional Brain Networks: From  
19 Connections to Cognition. *Science*, *342*(6158), 1238411.  
20 <https://doi.org/10.1126/science.1238411>
- 21 Poldrack, R. A., & Gorgolewski, K. J. (2014). Making big data open: Data sharing in  
22 neuroimaging. *Nature Neuroscience*, *17*(11), 1510–1517.  
23 <https://doi.org/10.1038/nn.3818>
- 24 Poline, J.-B., Breeze, J. L., Ghosh, S., Gorgolewski, K., Halchenko, Y. O., Hanke, M.,  
25 Haselgrove, C., Helmer, K. G., Keator, D. B., Marcus, D. S., Poldrack, R. A.,

- 1 Schwartz, Y., Ashburner, J., & Kennedy, D. N. (2012). Data sharing in neuroimaging  
2 research. *Frontiers in Neuroinformatics*, 6. <https://doi.org/10.3389/fninf.2012.00009>
- 3 Querfurth, H. W., & LaFerla, F. M. (2010). Alzheimer's Disease. *New England Journal of*  
4 *Medicine*, 362(4), 329–344. <https://doi.org/10.1056/NEJMra0909142>
- 5 Reisberg, B., Franssen, E. H., Hasan, S. M., Monteiro, I., Boksay, I., Souren, L. E. M.,  
6 Kenowsky, S., Auer, S. R., Elahi, S., & Kluger, A. (1999). Retrogenesis: Clinical,  
7 physiologic, and pathologic mechanisms in brain aging, Alzheimer's and other  
8 dementing processes. *European Archives of Psychiatry and Clinical Neurosciences*,  
9 249(S3), S28–S36. <https://doi.org/10.1007/PL00014170>
- 10 Rubinov, M., & Sporns, O. (2010). Complex network measures of brain connectivity: Uses  
11 and interpretations. *NeuroImage*, 52(3), 1059–1069.  
12 <https://doi.org/10.1016/j.neuroimage.2009.10.003>
- 13 Song, J., Birn, R. M., Boly, M., Meier, T. B., Nair, V. A., Meyerand, M. E., & Prabhakaran,  
14 V. (2014). Age-Related Reorganizational Changes in Modularity and Functional  
15 Connectivity of Human Brain Networks. *Brain Connectivity*, 4(9), 662–676.  
16 <https://doi.org/10.1089/brain.2014.0286>
- 17 Sørensen, Ø., Walhovd, K. B., & Fjell, A. M. (2021). A recipe for accurate estimation of  
18 lifespan brain trajectories, distinguishing longitudinal and cohort effects. *NeuroImage*,  
19 226, 117596. <https://doi.org/10.1016/j.neuroimage.2020.117596>
- 20 Sowell, E. R., Peterson, B. S., Thompson, P. M., Welcome, S. E., Henkenius, A. L., & Toga,  
21 A. W. (2003). Mapping cortical change across the human life span. *Nature*  
22 *Neuroscience*, 6(3), 309–315. <https://doi.org/10.1038/nn1008>
- 23 Sowell, E. R., Thompson, P. M., & Toga, A. W. (2004). Mapping Changes in the Human  
24 Cortex throughout the Span of Life. *The Neuroscientist*, 10(4), 372–392.  
25 <https://doi.org/10.1177/1073858404263960>



- 1 Sporns, O. (2011). The human connectome: A complex network. *Annals of the New York*  
2 *Academy of Sciences, 1224*, 109–125. <https://doi.org/10.1111/j.1749->  
3 [6632.2010.05888.x](https://doi.org/10.1111/j.1749-6632.2010.05888.x)
- 4 Sporns, O. (2013). Network attributes for segregation and integration in the human brain.  
5 *Current Opinion in Neurobiology, 23*(2), 162–171.  
6 <https://doi.org/10.1016/j.conb.2012.11.015>
- 7 Sporns, O., Honey, C. J., & Kötter, R. (2007). Identification and Classification of Hubs in  
8 Brain Networks. *PLoS ONE, 2*(10), e1049.  
9 <https://doi.org/10.1371/journal.pone.0001049>
- 10 Sporns, O., Tononi, G., & Kötter, R. (2005). The human connectome: A structural description  
11 of the human brain. *PLoS Computational Biology, 1*(4), e42.  
12 <https://doi.org/10.1371/journal.pcbi.0010042>
- 13 Steen, M., Hayasaka, S., Joyce, K., & Laurienti, P. (2011). Assessing the consistency of  
14 community structure in complex networks. *Physical Review E, 84*(1), 016111.  
15 <https://doi.org/10.1103/PhysRevE.84.016111>
- 16 Tamnes, C. K., Walhovd, K. B., Dale, A. M., Østby, Y., Grydeland, H., Richardson, G.,  
17 Westlye, L. T., Roddey, J. C., Hagler, D. J., Due-Tønnessen, P., Holland, D., & Fjell,  
18 A. M. (2013). Brain development and aging: Overlapping and unique patterns of  
19 change. *NeuroImage, 68*, 63–74. <https://doi.org/10.1016/j.neuroimage.2012.11.039>
- 20 Thompson, P. M., Jahanshad, N., Ching, C. R. K., Salminen, L. E., Thomopoulos, S. I.,  
21 Bright, J., Baune, B. T., Bertolín, S., Bralten, J., Bruin, W. B., Bülow, R., Chen, J.,  
22 Chye, Y., Dannlowski, U., de Kovel, C. G. F., Donohoe, G., Eyler, L. T., Faraone, S.  
23 V., Favre, P., ... Zelman, V. (2020). ENIGMA and global neuroscience: A decade of  
24 large-scale studies of the brain in health and disease across more than 40 countries.  
25 *Translational Psychiatry, 10*(1). <https://doi.org/10.1038/s41398-020-0705-1>

- 1 Toga, A. W., Thompson, P. M., & Sowell, E. R. (2006). Mapping brain maturation. *Trends in*  
2 *Neurosciences*, 29(3), 148–159. <https://doi.org/10.1016/j.tins.2006.01.007>
- 3 van den Heuvel, M., de Lange, S., Zalesky, A., Seguin, C., Yeo, T., & Schmidt, R. (2017).  
4 Proportional thresholding in resting-state fMRI functional connectivity networks and  
5 consequences for patient-control connectome studies: Issues and recommendations.  
6 *NeuroImage*. <https://doi.org/10.1016/j.neuroimage.2017.02.005>
- 7 van den Heuvel, M. P., Kahn, R. S., Goni, J., & Sporns, O. (2012). High-cost, high-capacity  
8 backbone for global brain communication. *Proceedings of the National Academy of*  
9 *Sciences of the United States of America*, 109(28), 11372–11377.  
10 <https://doi.org/10.1073/pnas.1203593109>
- 11 van den Heuvel, M. P., Scholtens, L. H., & de Reus, M. A. (2015). Topological organization  
12 of connectivity strength in the rat connectome. *Brain Structure & Function*.  
13 <https://doi.org/10.1007/s00429-015-0999-6>
- 14 van den Heuvel, M. P., Scholtens, L. H., van der Burgh, H. K., Agosta, F., Alloza, C.,  
15 Arango, C., Auyeung, B., Baron-Cohen, S., Basaia, S., Benders, M. J. N. L., Beyer, F.,  
16 Booi, L., Braun, K. P. J., Filho, G. B., Cahn, W., Cannon, D. M., Chaim-Avancini, T.  
17 M., Chan, S. S. M., Chen, E. Y. H., ... Lange, S. C. de. (2019). 10Kin1day: A Bottom-  
18 Up Neuroimaging Initiative. *Frontiers in Neurology*, 10.  
19 <https://doi.org/10.3389/fneur.2019.00425>
- 20 van den Heuvel, M. P., & Sporns, O. (2011). Rich-Club Organization of the Human  
21 Connectome. *Journal of Neuroscience*, 31(44), 15775–15786.  
22 <https://doi.org/10.1523/JNEUROSCI.3539-11.2011>
- 23 van den Heuvel, M. P., & Sporns, O. (2013). Network hubs in the human brain. *Trends in*  
24 *Cognitive Sciences*, 17(12), 683–696. <https://doi.org/10.1016/j.tics.2013.09.012>
- 25 van den Heuvel, M. P., Sporns, O., Collin, G., Scheewe, T., Mandl, R. C. W., Cahn, W.,  
26 Goni, J., Pol, H. E. H., & Kahn, R. S. (2013). Abnormal Rich Club Organization and

- 1           Functional Brain Dynamics in Schizophrenia. *JAMA Psychiatry (Chicago, Ill.)*, 70(8),  
2           783–792. <https://doi.org/10.1001/jamapsychiatry.2013.1328>
- 3   Van Essen, D. C., Smith, S. M., Barch, D. M., Behrens, T. E. J., Yacoub, E., Ugurbil, K., &  
4           Consortium, for the W.-M. H. (2013). The WU-Minn Human Connectome Project:  
5           An overview. *NeuroImage*, 80(C), 62–79.  
6           <https://doi.org/10.1016/j.neuroimage.2013.05.041>
- 7   van Wijk, B. C. M., Stam, C. J., & Daffertshofer, A. (2010). Comparing Brain Networks of  
8           Different Size and Connectivity Density Using Graph Theory. *PLoS ONE*, 5(10).  
9           <https://doi.org/10.1371/journal.pone.0013701>
- 10   Walhovd, K. B., Krogsrud, S. K., Amlien, I. K., Bartsch, H., Bjørnerud, A., Due-Tønnessen,  
11           P., Grydeland, H., Hagler, D. J., Håberg, A. K., Kremen, W. S., Ferschmann, L.,  
12           Nyberg, L., Panizzon, M. S., Rohani, D. A., Skranes, J., Storsve, A. B., Sølsnes, A. E.,  
13           Tamnes, C. K., Thompson, W. K., ... Fjell, A. M. (2016). Neurodevelopmental origins  
14           of lifespan changes in brain and cognition. *Proceedings of the National Academy of*  
15           *Sciences*, 113(33), 9357–9362. <https://doi.org/10.1073/pnas.1524259113>
- 16   Wierenga, L. M., van den Heuvel, M. P., Oranje, B., Giedd, J. N., Durston, S., Peper, J. S.,  
17           Brown, T. T., Crone, E. A., & The Pediatric Longitudinal Imaging, Neurocognition,  
18           and Genetics Study. (2018). A multisample study of longitudinal changes in brain  
19           network architecture in 4-13-year-old children. *Human Brain Mapping*, 39(1), 157–  
20           170. <https://doi.org/10.1002/hbm.23833>
- 21   Wierenga, L. M., van den Heuvel, M. P., van Dijk, S., Rijks, Y., de Reus, M. A., & Durston,  
22           S. (2015). The development of brain network architecture. *Human Brain Mapping*,  
23           n/a-n/a. <https://doi.org/10.1002/hbm.23062>
- 24   Wood, S., & Scheipl, F. (2017). *gamm4: Generalized Additive Mixed Models using 'mgcv'*  
25           *and 'lme4'*. <https://CRAN.R-project.org/package=gamm4>.

- 1 Zhao, T., Cao, M., Niu, H., Zuo, X.-N., Evans, A., He, Y., Dong, Q., & Shu, N. (2015). Age-  
2 related changes in the topological organization of the white matter structural  
3 connectome across the human lifespan: Lifespan Trajectory of Human Structural  
4 Connectome. *Human Brain Mapping*, 36(10), 3777–3792.  
5 <https://doi.org/10.1002/hbm.22877>
- 6 Ziegler, G., Dahnke, R., Jäncke, L., Yotter, R. A., May, A., & Gaser, C. (2012). Brain  
7 structural trajectories over the adult lifespan. *Human Brain Mapping*, 33(10), 2377–  
8 2389. <https://doi.org/10.1002/hbm.21374>
- 9
